# Supplementary material
Source: PubMed Central journal article supplement (PMC3911236)
Supplement: JB.00995-13_zjb999092967so1.pdf [file JB.00995-13_zjb999092967so1.pdf]

|                             |                            | <b>1% DMSO</b>                    | <b>0.2 <math>\mu</math>M XIP</b>  | <b>2 <math>\mu</math>M XIP</b>     | <b>20 <math>\mu</math>M XIP</b>    |
|-----------------------------|----------------------------|-----------------------------------|-----------------------------------|------------------------------------|------------------------------------|
| <b>beginning</b>            | <b>Doubling time (min)</b> | <b>85.2 <math>\pm</math> 1.3</b>  | <b>194.2 <math>\pm</math> 6.0</b> | <b>252.7 <math>\pm</math> 33.1</b> | <b>423.8 <math>\pm</math> 24.9</b> |
|                             | <b>Final OD</b>            | <b>1.01 <math>\pm</math> 0.05</b> | <b>0.99 <math>\pm</math> 0.01</b> | <b>0.71 <math>\pm</math> 0.03</b>  | <b>0.37 <math>\pm</math> 0.01</b>  |
| <b>OD<sub>600</sub>=0.2</b> | <b>Doubling time (min)</b> | <b>85.6 <math>\pm</math> 0.9</b>  | <b>89.5 <math>\pm</math> 2.7</b>  | <b>114.9 <math>\pm</math> 8.5</b>  | <b>131.3 <math>\pm</math> 2.2</b>  |
|                             | <b>Final OD</b>            | <b>1.14 <math>\pm</math> 0.04</b> | <b>0.99 <math>\pm</math> 0.07</b> | <b>0.84 <math>\pm</math> 0.06</b>  | <b>0.87 <math>\pm</math> 0.03</b>  |
| <b>OD<sub>600</sub>=0.4</b> | <b>Doubling time (min)</b> | <b>84.7 <math>\pm</math> 12.5</b> | <b>83.5 <math>\pm</math> 2.8</b>  | <b>93.3 <math>\pm</math> 2.5</b>   | <b>102.2 <math>\pm</math> 3.6</b>  |
|                             | <b>Final OD</b>            | <b>1.17 <math>\pm</math> 0.01</b> | <b>1.17 <math>\pm</math> 0.01</b> | <b>0.96 <math>\pm</math> 0.02</b>  | <b>1.02 <math>\pm</math> 0.01</b>  |
| <b>OD<sub>600</sub>=0.8</b> | <b>Doubling time (min)</b> | <b>N.D.</b>                       | <b>N.D.</b>                       | <b>N.D.</b>                        | <b>N.D.</b>                        |
|                             | <b>Final OD</b>            | <b>1.02 <math>\pm</math> 0.05</b> | <b>1.06 <math>\pm</math> 0.03</b> | <b>1.06 <math>\pm</math> 0.04</b>  | <b>1.11 <math>\pm</math> 0.02</b>  |

1

2 **N.D. = Not determined**

3 **Table S1. Doubling times and final OD of wild-type UA159 cultures, with the addition of sXIP at the beginning of the incubation period,**

4 **or at different optical densities of 0.2, 0.4, or 0.8.**

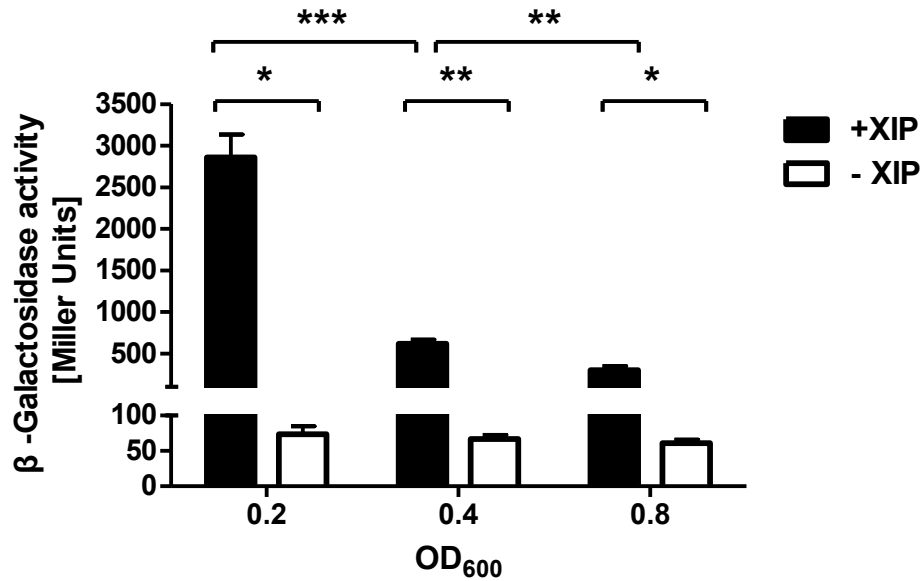

5

6 **Fig. S1. Response of *comS* to exogenously-added XIP at different growth**  
 7 **phases in FMC medium.** The  $P_{comS}$ -*lacZ* strain was grown to optical densities of 0.2  
 8 (early-), 0.4 (mid-), or 0.8 (late-exponential phase) in FMC and then incubated with 1%  
 9 DMSO or 2  $\mu$ M synthetic XIP (sXIP) for 1 h. Expression of *comS* was measured by  
 10 LacZ assays. The data shown are means  $\pm$  standard deviations (error bars) of three  
 11 biological replicates conducted in triplicate. Statistical analyses were performed using  
 12 Student's *t* test: \* $P < 0.05$ , \*\* $P < 0.01$ , \*\*\* $P < 0.001$ .

13

14

15

16

17

18

19

20

21

22

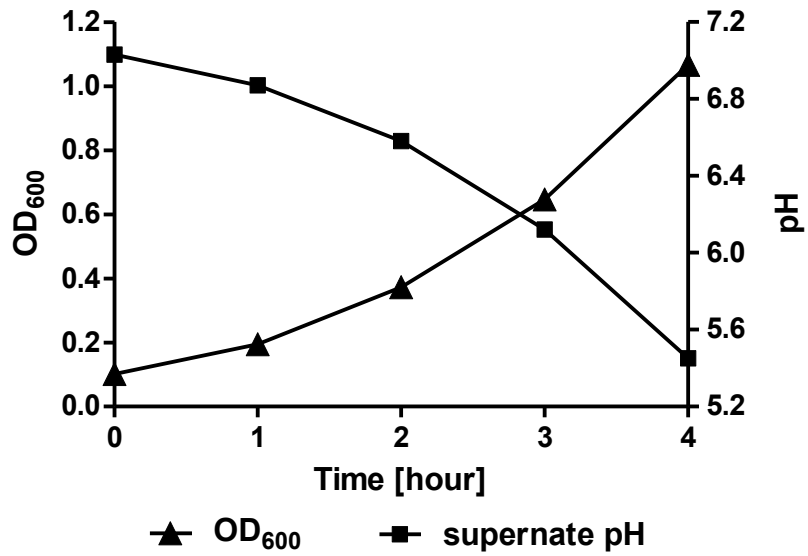

23

24 **Fig. S2. Growth curve and supernatant pH.** *S. mutans* UA159 was grown in FMC  
 25 medium containing 25 mM glucose. OD<sub>600</sub> values and pH values of the cultures were  
 26 measured starting from OD<sub>600</sub> = 0.1 (0 h) at 1h intervals. Data points are the averages  
 27 of triplicate samples.

28

29

30

31

32

33

34

35

36

37

38

39

40

41

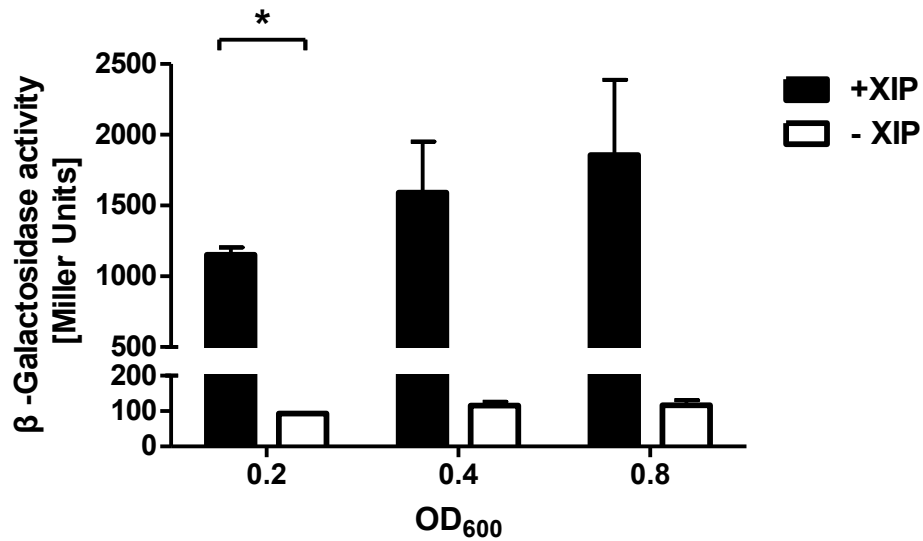

42

43 **Fig. S3. Induction of *comS* by exogenously-added XIP in buffered FMC.** 2 μM  
 44 synthetic XIP (sXIP) was added to cultures at optical densities of 0.2 (early-), 0.4  
 45 (mid-), or 0.8 (late-exponential phase) in FMC that was buffered at 7.0 with 100 mM  
 46 K-phosphate. Expression of *comS* was measured by LacZ assays. The data shown  
 47 are means ± standard deviations (error bars) of three biological replicates conducted  
 48 in triplicate. Statistical analyses were performed using Student's *t* test: \**P* < 0.05.

49

50

51

52

53

54

55

56

57

58

59

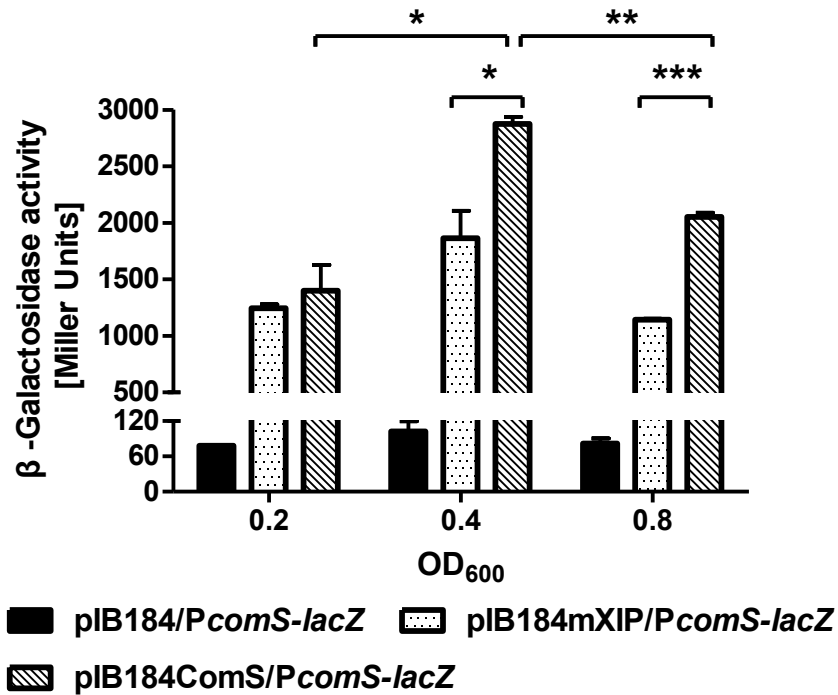

60

61 **Fig. S4. Induction of *comS* in cells endogenously overproducing ComS or mXIP.**

62 The strains, including pIB184ComS/*PcomS-lacZ* (ComS overexpressing),

63 pIB184mXIP/*PcomS-lacZ* (mXIP overexpressing), and pIB184/*PcomS-lacZ* (vehicle

64 control), were grown to optical densities of 0.2 (early-), 0.4 (mid-), or 0.8

65 (late-exponential phase) in FMC and then expression of *comS* was measured by LacZ

66 assays. The data shown are means  $\pm$  standard deviations (error bars) of three

67 biological replicates conducted in triplicate. Statistical analyses were performed using

68 Student's *t* test: \**P* < 0.05, \*\**P* < 0.01, \*\*\**P* < 0.001.

69

70

71

72

73

74

75

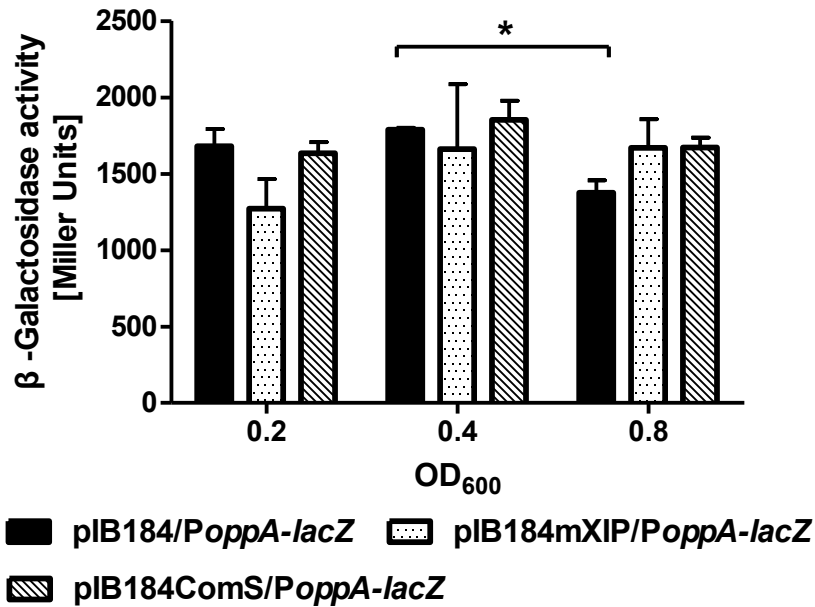

76

77 **Fig. S5. Expression of the *oppA* gene in strains endogenously overproducing**

78 **ComS or mXIP.** The strains, including pIB184ComS/*P<sub>oppA</sub>-lacZ* (ComS

79 overexpressing), pIB184mXIP/*P<sub>oppA</sub>-lacZ* (mXIP overexpressing), and

80 pIB184/*P<sub>oppA</sub>-lacZ* (vehicle control), were grown to optical densities of 0.2 (early-), 0.4

81 (mid-), or 0.8 (late-exponential phase) in FMC, and then expression of *oppA* was

82 measured by LacZ assays. The data shown are means  $\pm$  standard deviations (error

83 bars) of three biological replicates conducted in triplicate. Statistical analyses were

84 performed using Student's *t* test: \**P* < 0.05.

85

86

87

88

89

90

91

92

93

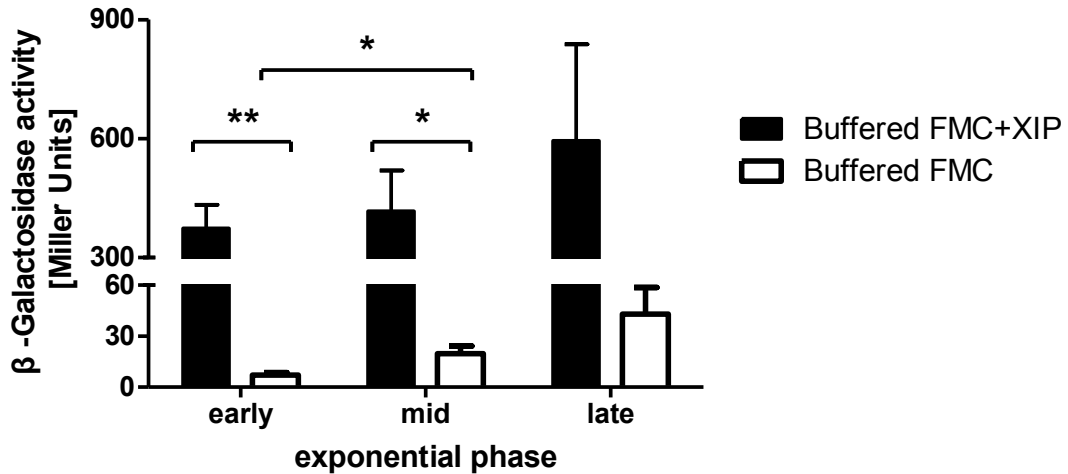

94  
 95 **Fig. S6. Induction of *comX* by exogenously-added XIP in FMC buffered with the**  
 96 **same concentration of K- and Na-phosphates as CDM. 2  $\mu$ M synthetic XIP (sXIP)**  
 97 **was added to cultures at optical densities of 0.2 (early-), 0.4 (mid-), or 0.6**  
 98 **(late-exponential phase) in FMC that was buffered at 7.0 with K- (8.5 mM) and Na-**  
 99 **(74.9 mM) phosphates to mimic CDM. Expression of *comX* was measured by LacZ**  
 100 **assays. The data shown are means  $\pm$  standard deviations (error bars) of three**  
 101 **biological replicates conducted in triplicate. Statistical analyses were performed using**  
 102 **Student's *t* test: \**P* < 0.05, \*\**P* < 0.01.**
